# Supplementary material
Source: publisher figshare collection journal article supplement (https://adisjournals.figshare.com/ndownloader/files/22256577)
Supplement: Supplementary file 1 [file 22256577]

## Safety and Efficacy of Repeat Administration of Triamcinolone Acetonide Extended-Release in Osteoarthritis of the Knee: A Phase 3b, Open-label Study

Spitzer, A.I., Richmond, J.C., Kraus, V.B. et al. Rheumatol Ther (2019) 6: 109. <https://doi.org/10.1007/s40744-019-0140-z>

### Study Location

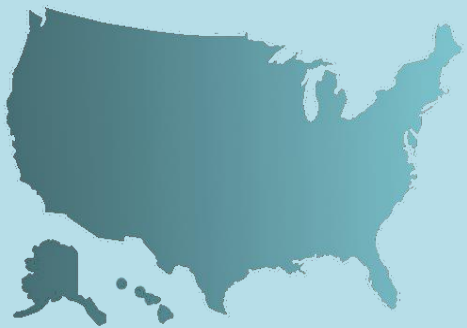

USA

### Indication

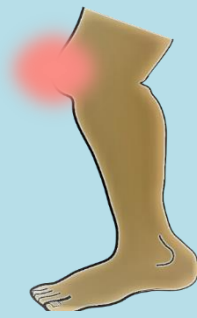

Knee OA

### Study Population

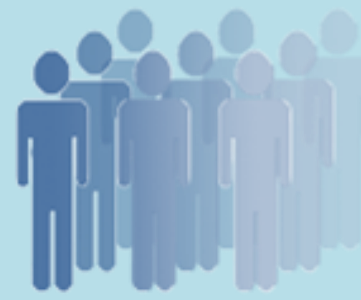

208 patients

### Study Design

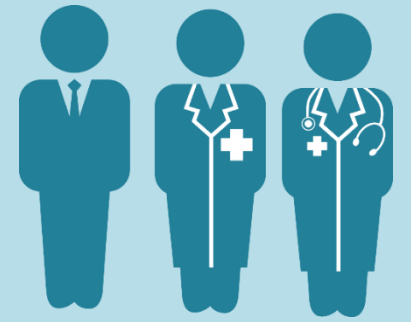

Phase 3b, single-arm, open-label

### Inclusion Criteria

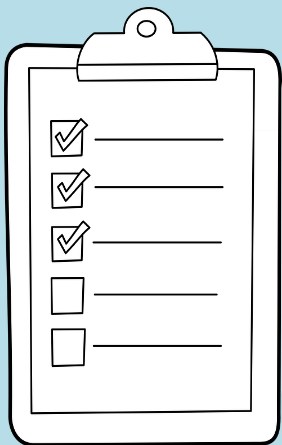

- Age  $\geq 40$  years
- Knee OA per ACR criteria
- OA symptoms  $\geq 6$  months
- Index-knee pain  $> 15$  days in the past month
- WOMAC-A (pain) total sum  $\geq 6$

### Therapy

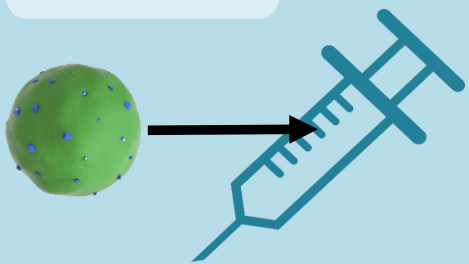

**Triamcinolone Acetonide Extended-Release**, a novel poly(lactic-co-glycolic acid) microsphere-based formulation of triamcinolone acetonide

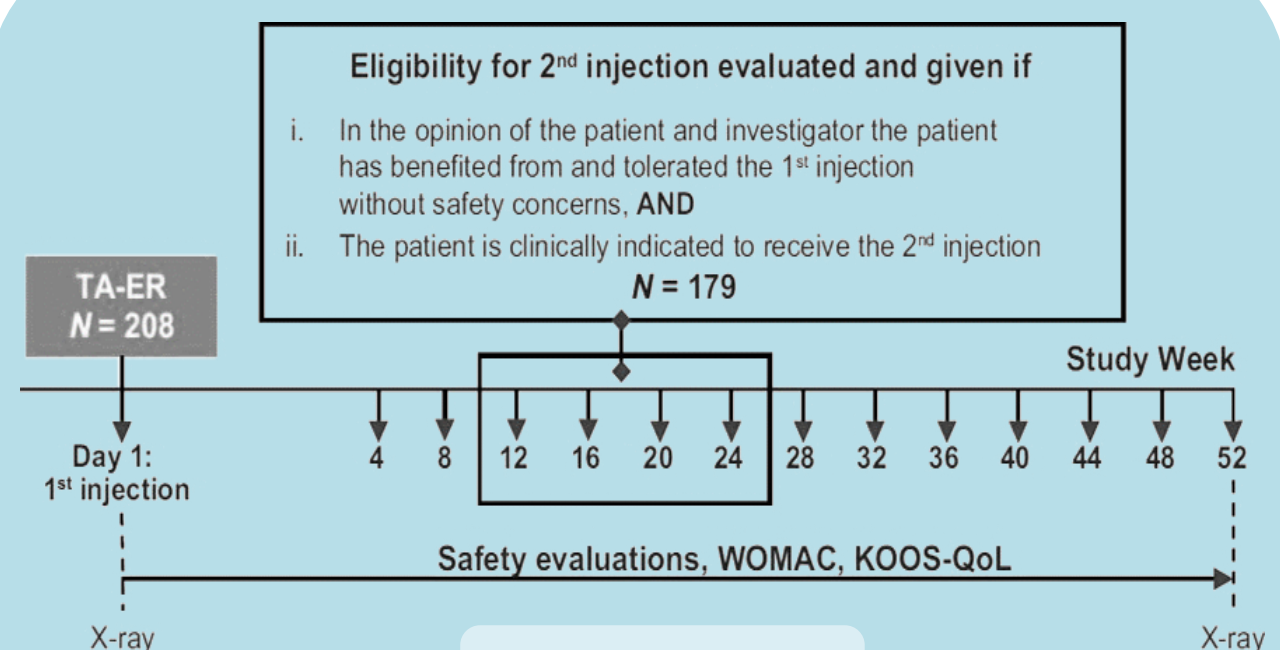

## Why carry out this study?

Many patients receive repeated doses of IA **corticosteroids** to manage knee pain related to OA due, at least in part, to the rapid efflux from the joint of traditional corticosteroid crystalline suspensions.

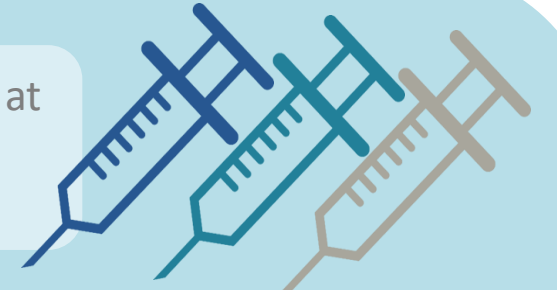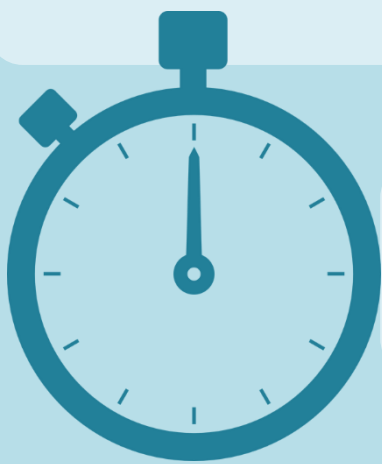

Single IA injections of the extended-release formulation of **triamcinolone acetonide extended-release** (TA-ER) demonstrated prolonged joint residency times and sustained, clinically relevant benefit in patients with **knee OA**.

This study was conducted to assess the **safety** and exploratory **efficacy** of repeat administration of TA-ER. It utilized a flexible dosing interval for patients to receive a 2<sup>nd</sup> injection based on duration of benefit from the 1<sup>st</sup> injection. The patient population included in this study was reflective of those seen in “real-world” clinical practice.

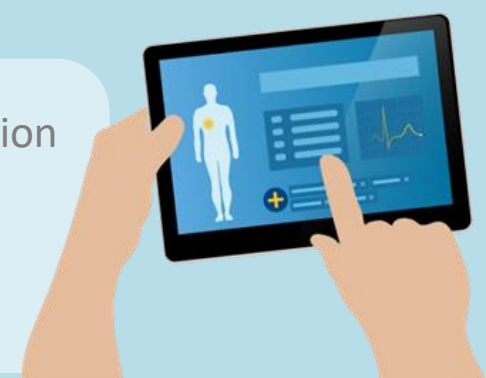

## What was learned from the study?

### Safety

The **safety** profile was similar between the 1<sup>st</sup> and 2<sup>nd</sup> injections, with no unexpected adverse events or significant radiographic changes at Week 52.

### Duration

**86.1%** of patients received the 2<sup>nd</sup> injection, with a median time to 2<sup>nd</sup> injection of **16.6 weeks**.

### Response Improvement

Through 12 weeks after both injections, the magnitude and duration of clinical benefit were similar, and most patients reported a substantial ( $\geq 50\%$  improvement) analgesic response.

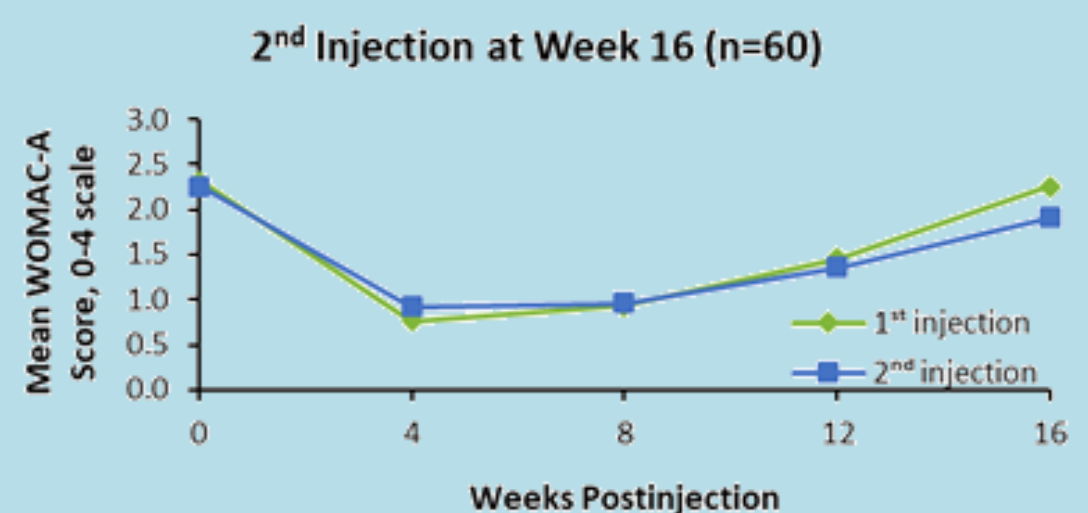

Comparison of mean WOMAC-A (pain) scores following the 1<sup>st</sup> and 2<sup>nd</sup> TA-ER injections for patients who received the 2<sup>nd</sup> injection at Week 16 ( $N = 60$ ) (efficacy population)

**Abbreviations:** OA = Osteoarthritis; ACR = American College of Rheumatology; IA = intra-articular; WOMAC-A = Western Ontario and McMaster Universities Osteoarthritis Index
